# Supplementary material for: Quinoxaline-based thermally activated delayed fluorescence emitters for highly efficient organic light-emitting diodes
Source: Royal Society of Chemistry journal article supplement (doi:10.1039/d2tc04403j), 2023-01-01
Supplement: d2tc04403j1.pdf [file d2tc04403j1.pdf]

Electronic Supplementary Information

## **Quinoxaline-based thermally activated delayed fluorescence emitters for highly efficient organic light emitting diode**

Xiaoning Li<sup>a</sup>, Yi Chen<sup>a</sup>, Shuhui Li<sup>d</sup>, Aisen Li<sup>e</sup>, Liangjing Tu<sup>a</sup>, Dongdong Zhang<sup>\*b</sup>, Lian Duan<sup>b</sup>, Yujun Xie<sup>\*a</sup>, Ben Zhong Tang<sup>\*ac</sup>, Zhen Li<sup>\*adef</sup>

<sup>a</sup>Institute of Molecular Aggregation Science, Tianjin University, Tianjin, 300072, China

E-mail: xieyujun@tju.edu.cn.

<sup>b</sup>Key Lab of Organic Optoelectronics and Molecular Engineering of Ministry of Education, Department of Chemistry, Tsinghua University Beijing 100084, China

E-mail: ddzhang@mail.tsinghua.edu.cn

<sup>c</sup>Shenzhen Institute of Molecular Aggregate Science and Engineering, School of Science and Engineering, The Chinese University of Hong Kong, Shenzhen, 2001 Longxiang Boulevard, Longgang District, 518172 Shenzhen City, Guangdong, China.

E-mail: tangbenz@cuhk.edu.cn

<sup>d</sup>Department of Chemistry, Wuhan University, Wuhan, Hubei, 430072, China.

E-mail: lizhen@whu.edu.cn.

<sup>e</sup>Joint School of National University of Singapore and Tianjin University, International Campus of Tianjin University Binhai New City, Fuzhou, Fujian, 350207, China

<sup>f</sup>Wuhan National Laboratory for Optoelectronics, Huazhong University of Science and Technology, Wuhan 430074, China

# Contents

- 1. CV curves of Br-TTPZ and NMR Spectra**
- 2. HRMS Spectra**
- 3. DSC Voltammogram**
- 4. Photophysical Properties**
- 5. Device Performances**

## 1. CV curves of Br-TTPZ and NMR Spectra

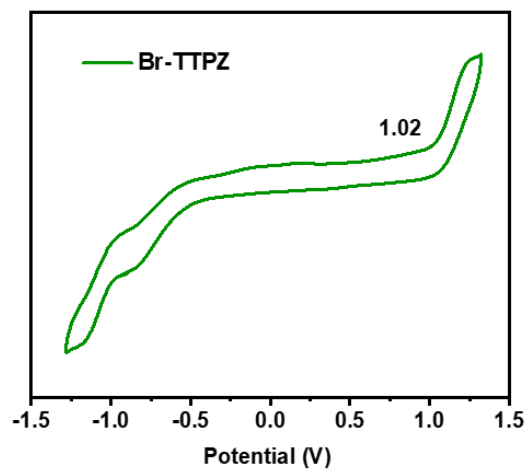

Figure S1. Cyclic voltammogram of Br-TTPZ.

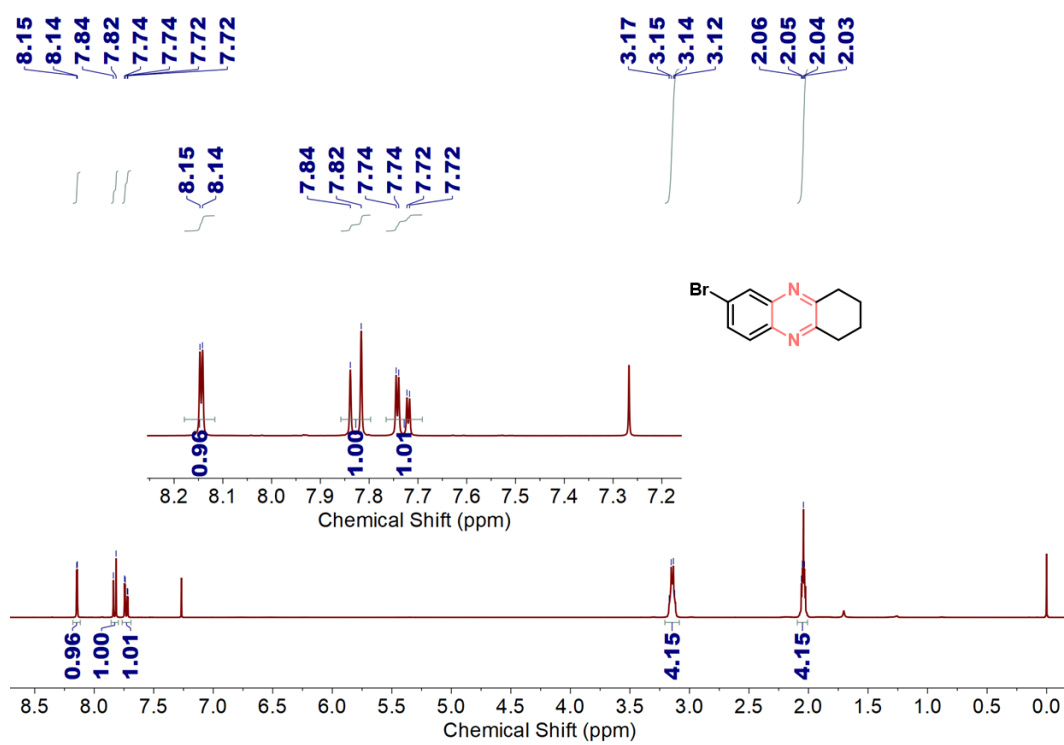

Figure S2. <sup>1</sup>H NMR spectrum of Br-TTPZ.

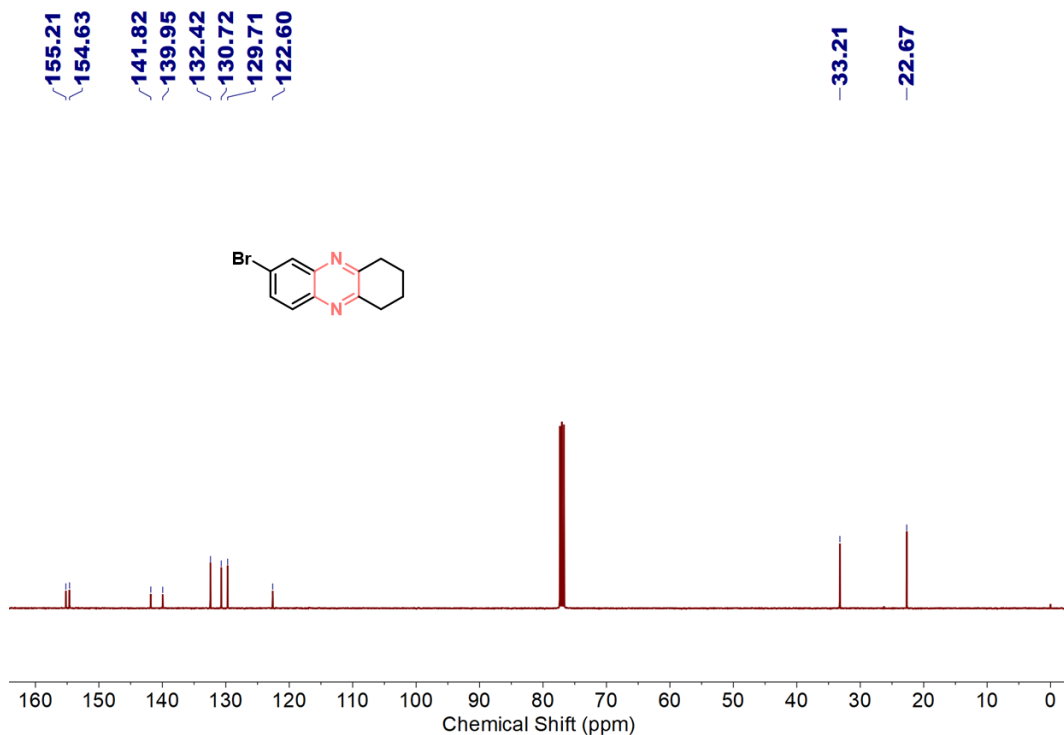

Figure S3.  $^{13}\text{C}$  NMR spectrum of Br-TTPZ.

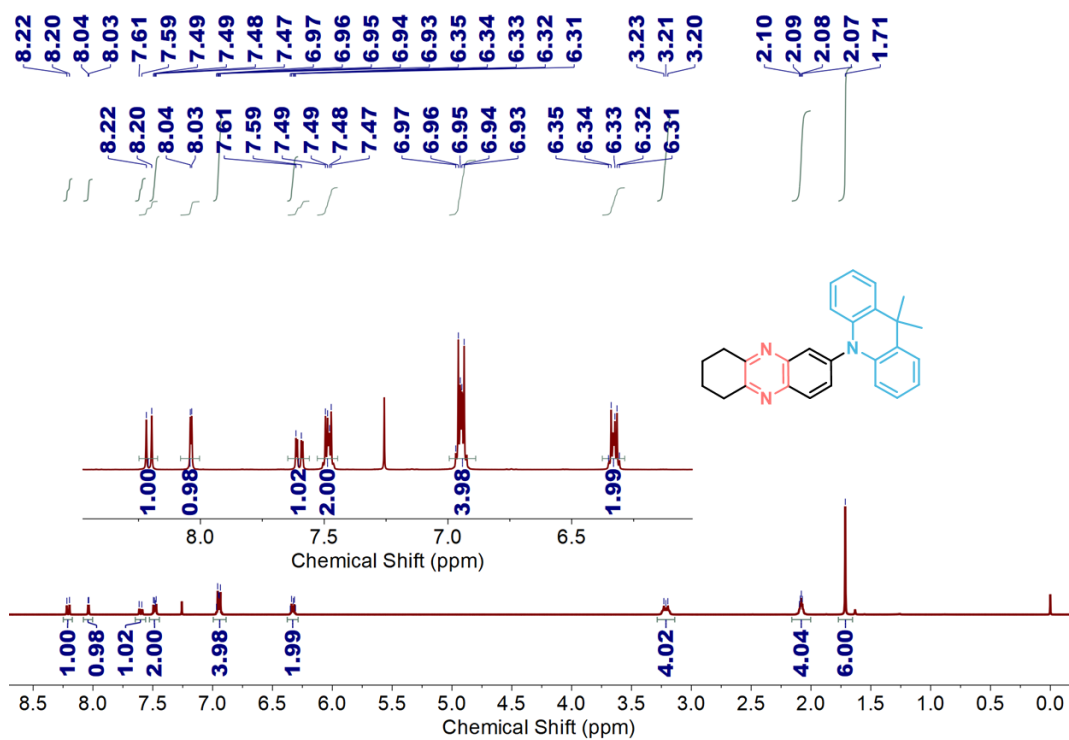

Figure S4.  $^1\text{H}$  NMR spectrum of DMAC-TTPZ.

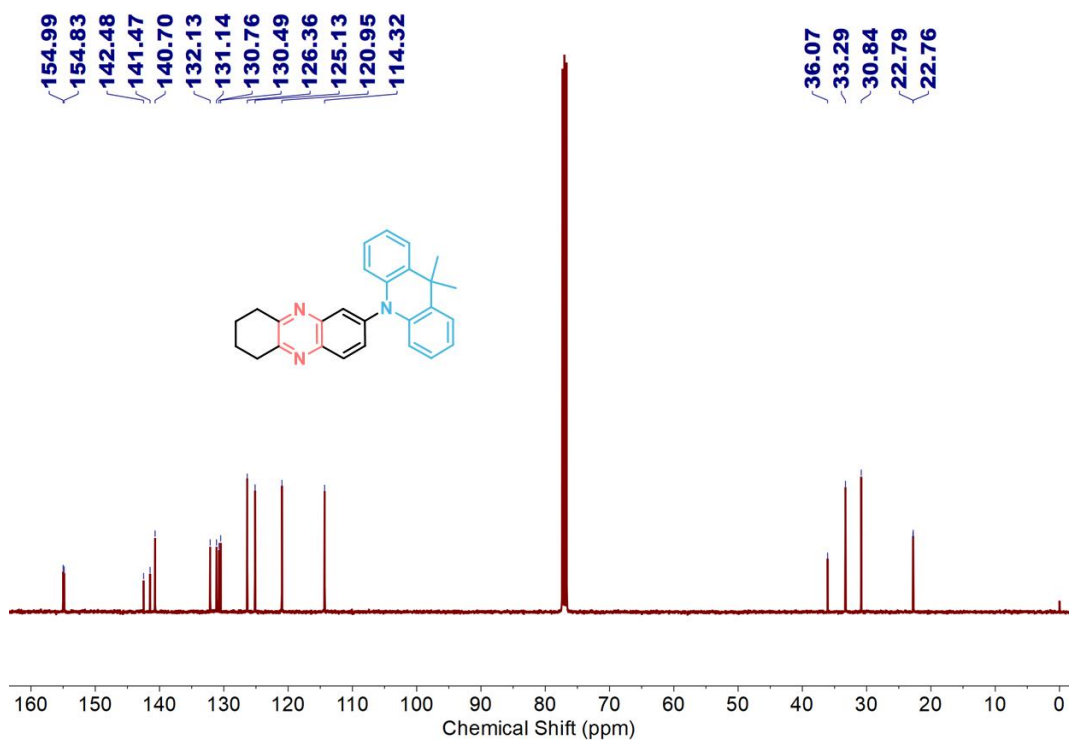

Figure S5. <sup>13</sup>C NMR spectrum of DMAC-TTPZ.

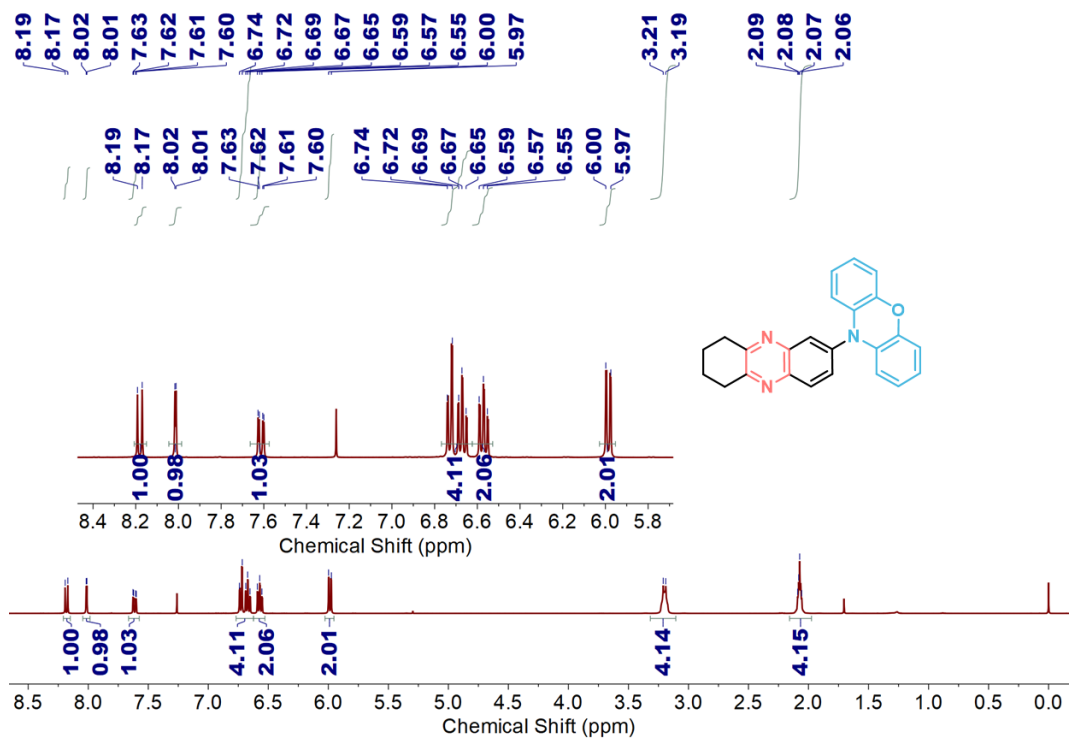

Figure S6. <sup>1</sup>H NMR spectrum of PXZ-TTPZ.

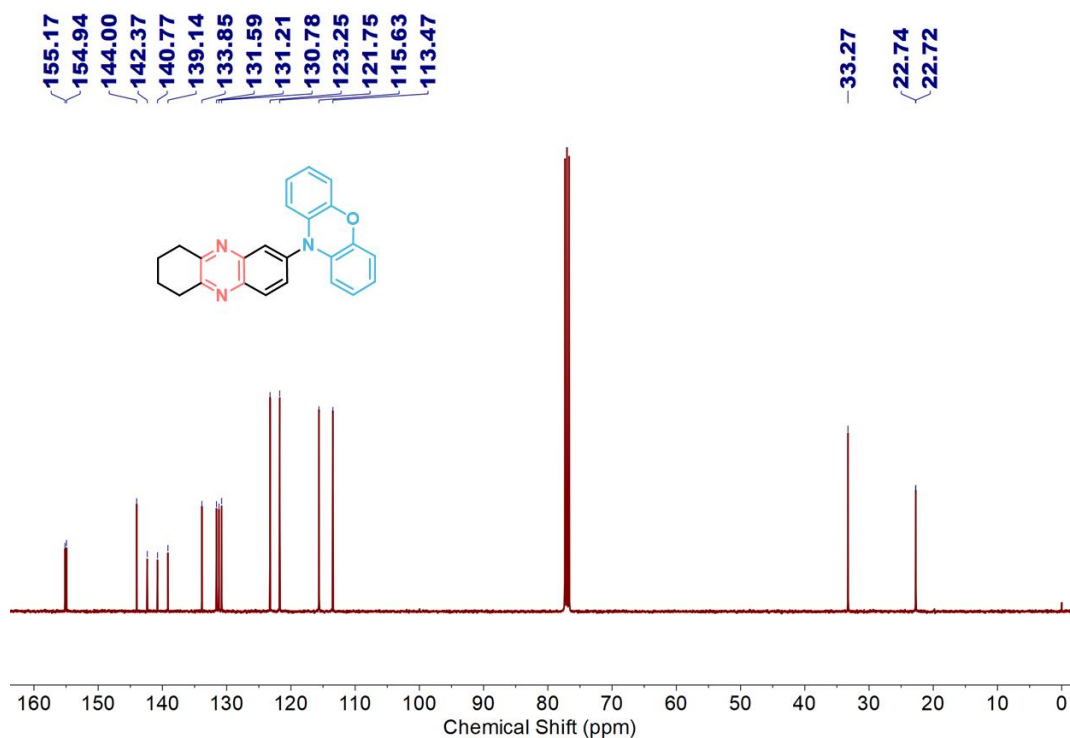

Figure S7. <sup>13</sup>C NMR spectrum of PXZ-TTPZ.

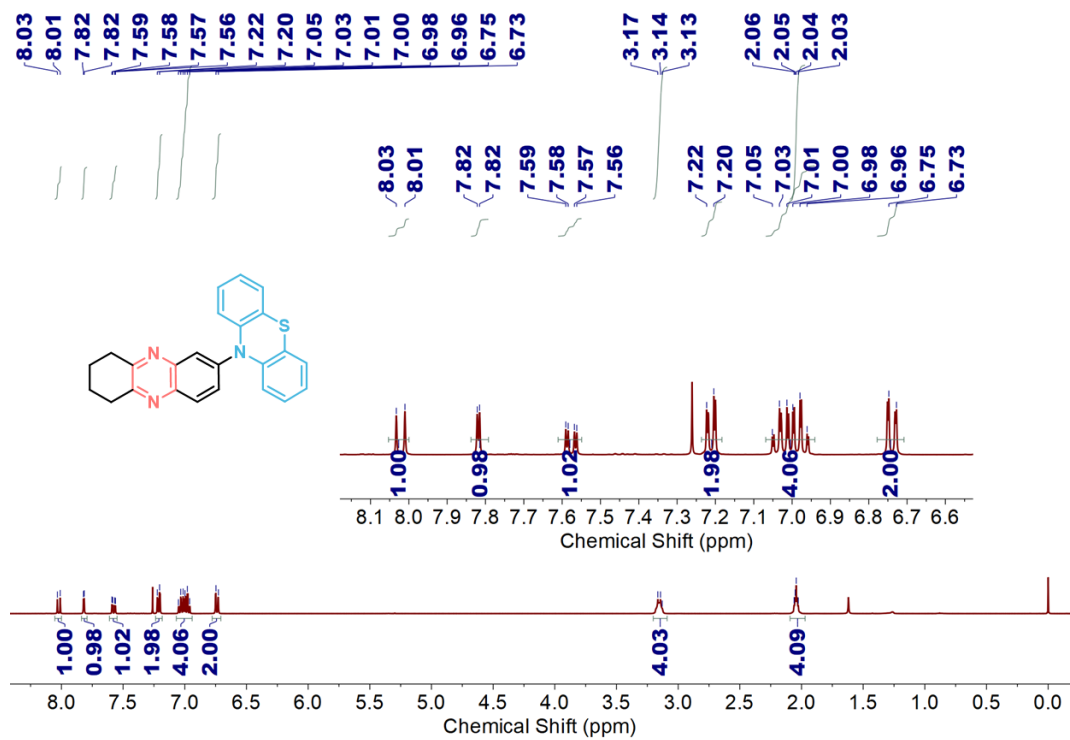

Figure S8. <sup>1</sup>H NMR spectrum of PTZ-TTPZ.

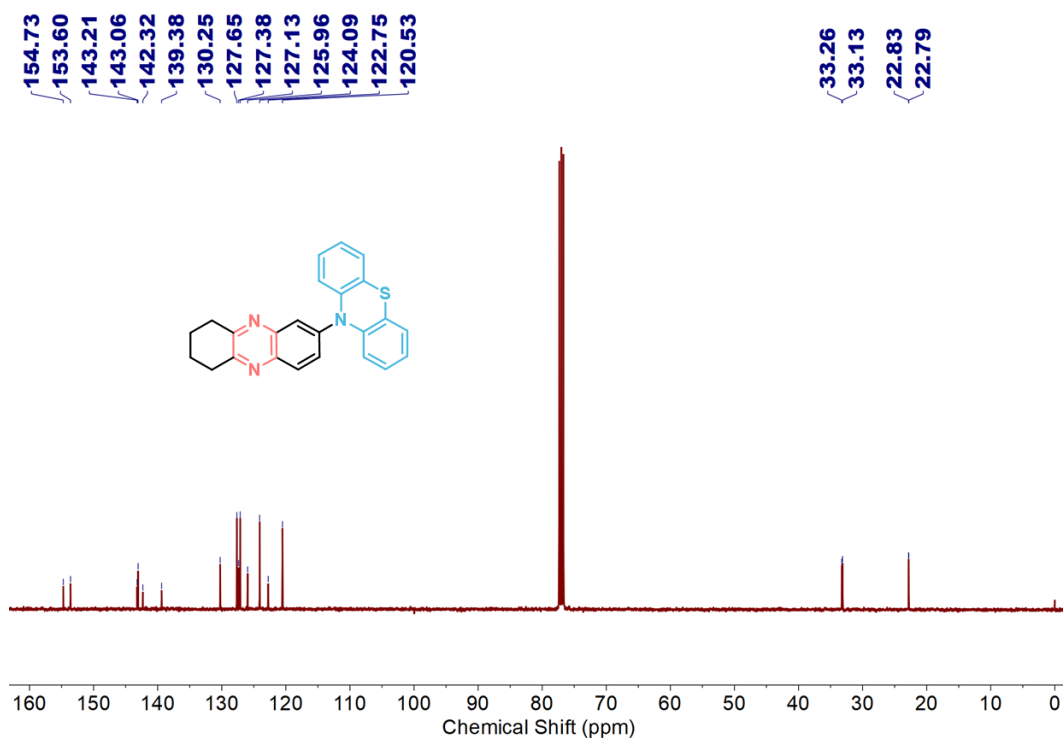

Figure S9.  $^{13}\text{C}$  NMR spectrum of PTZ-TTPZ.

## 2. HRMS Spectra

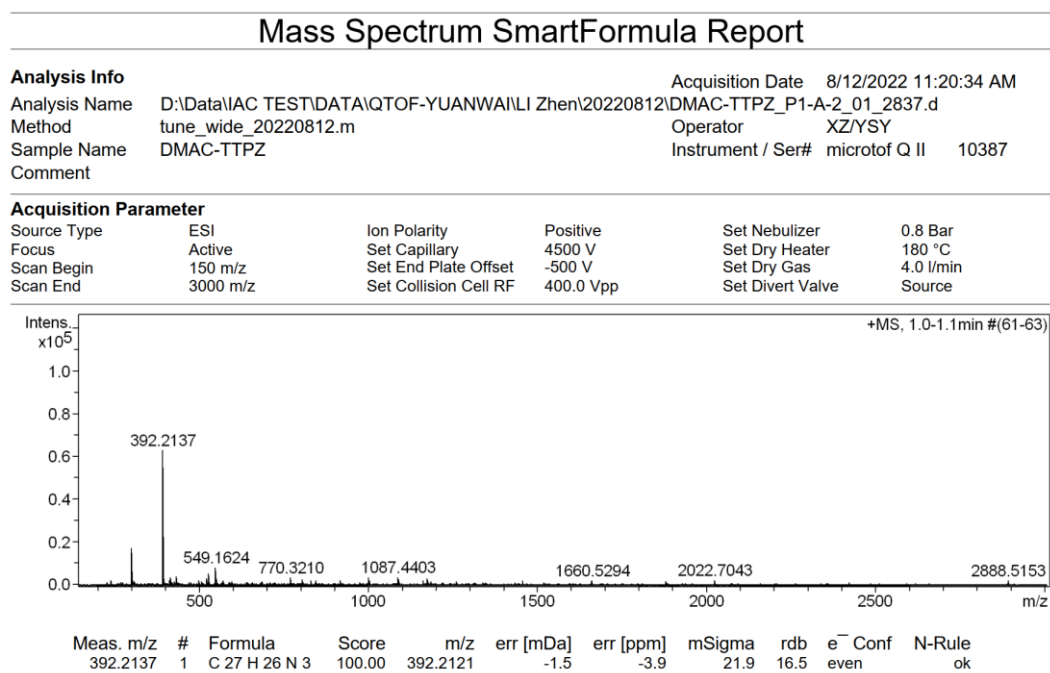

**Figure S10.** HRMS spectrum of DMAC-TTPZ.

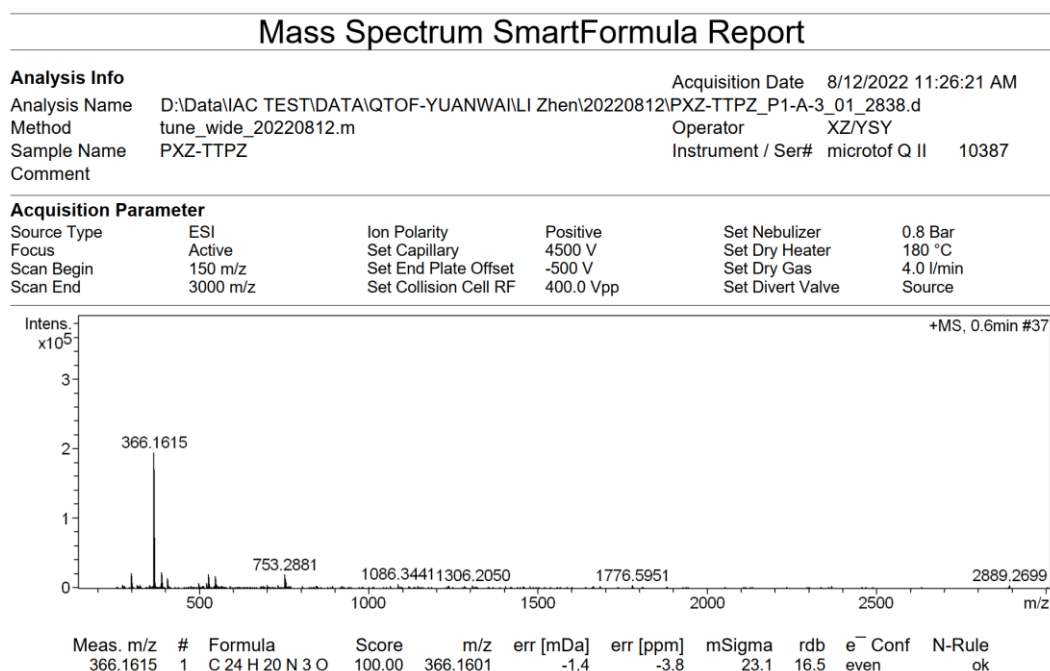

**Figure S11.** HRMS spectrum of PXZ-TTPZ.

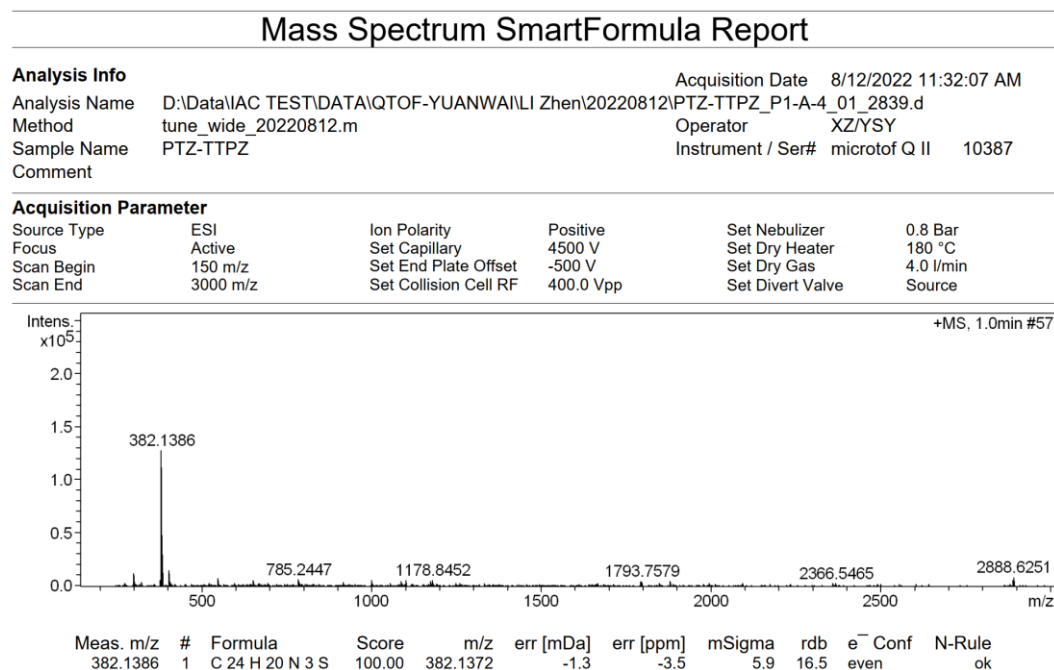

**Figure S12.** HRMS spectrum of PTZ-TTPZ.



### 3. DSC Voltammogram

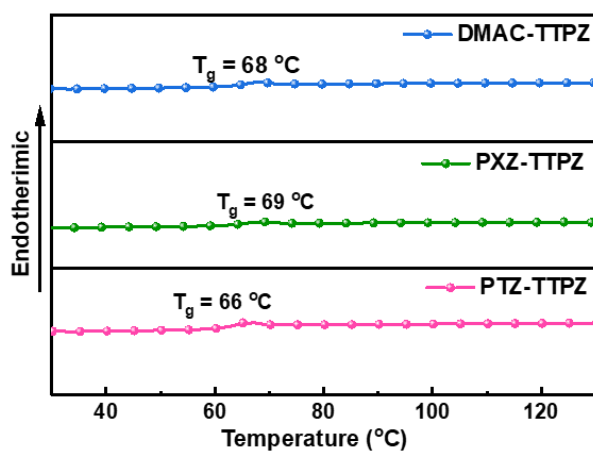

Figure S13. DSC voltammogram of DMAC-TTPZ, PXZ-TTPZ, and PTZ-TTPZ.

### 4. Photophysical Properties

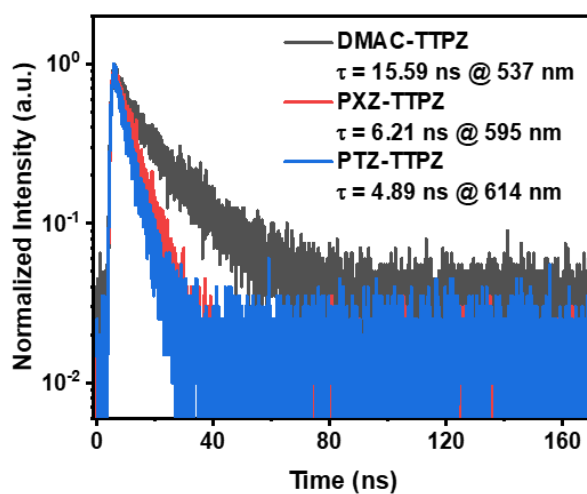

Figure S14. Time-resolved PL decay curves of DMAC-TTPZ, PXZ-TTPZ, and PTZ-TTPZ in toluene solution ( $5 \times 10^{-5}\text{ mol L}^{-1}$ ) under  $\text{N}_2$  atmosphere.

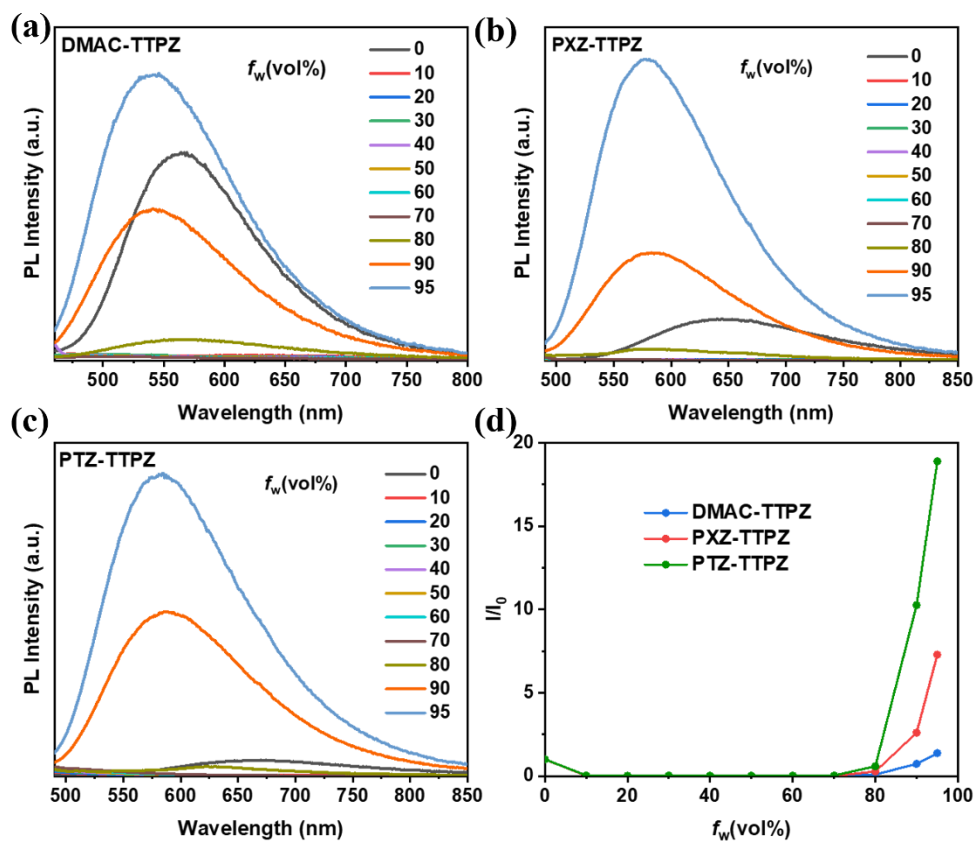

Figure S15. PL spectra of DMAC-TTPZ (a), PXZ-TTPZ (b), and PTZ-TTPZ (c) in THF-water mixtures with different water fractions ( $f_w$ ). Concentration:  $5 \times 10^{-5}$  mol L<sup>-1</sup>. (d) Plots of  $I/I_0$  versus  $f_w$  for DMAC-TTPZ, PXZ-TTPZ, and PTZ-TTPZ.  $I_0$  is the PL intensity in pure THF solution.

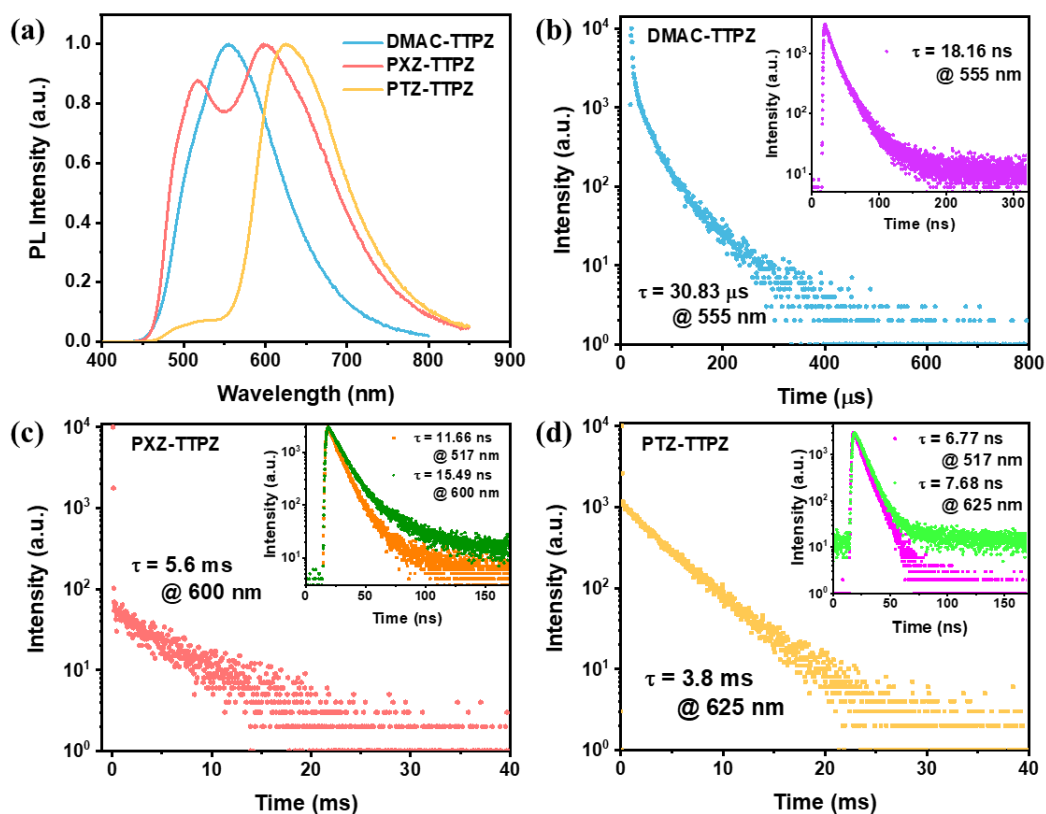

Figure S16. PL spectra (a) and time-resolved PL decay curves of DMAC-TTPZ (b), PXZ-TTPZ (c), and PTZ-TTPZ (d) in the solid state.

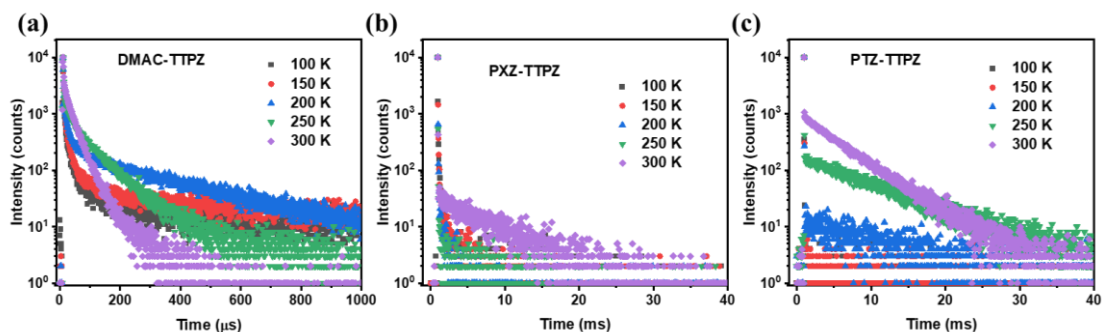

Figure S17. Time-resolved PL decay curves of DMAC-TTPZ (d), PXZ-TTPZ (e), and PTZ-TTPZ (f) in the solid state at different temperatures.

**Table S1.** Photodynamic parameter of PXZ-TTPZ.

| Compound | $k_p$ [ $s^{-1}$ ] | $k_d$ [ $s^{-1}$ ] | $k_r$ [ $s^{-1}$ ] | $k_{ISC}$ [ $s^{-1}$ ] | $k_{RISC}$ [ $s^{-1}$ ] |
|----------|--------------------|--------------------|--------------------|------------------------|-------------------------|
| PXZ-TTPZ | $4.4 \times 10^7$  | $1.0 \times 10^5$  | $9.5 \times 10^6$  | $2.6 \times 10^7$      | $2.5 \times 10^5$       |

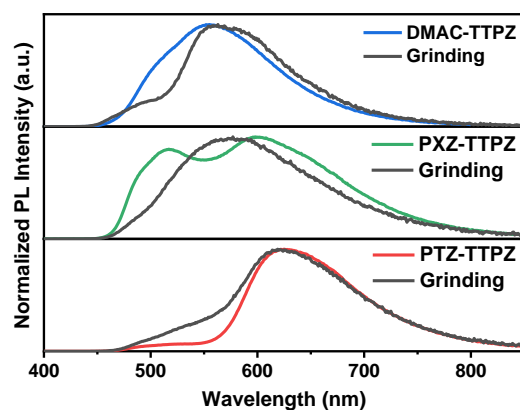

Figure S18. PL spectra of DMAC-TTPZ, PXZ-TTPZ, and PTZ-TTPZ before and after grinding.

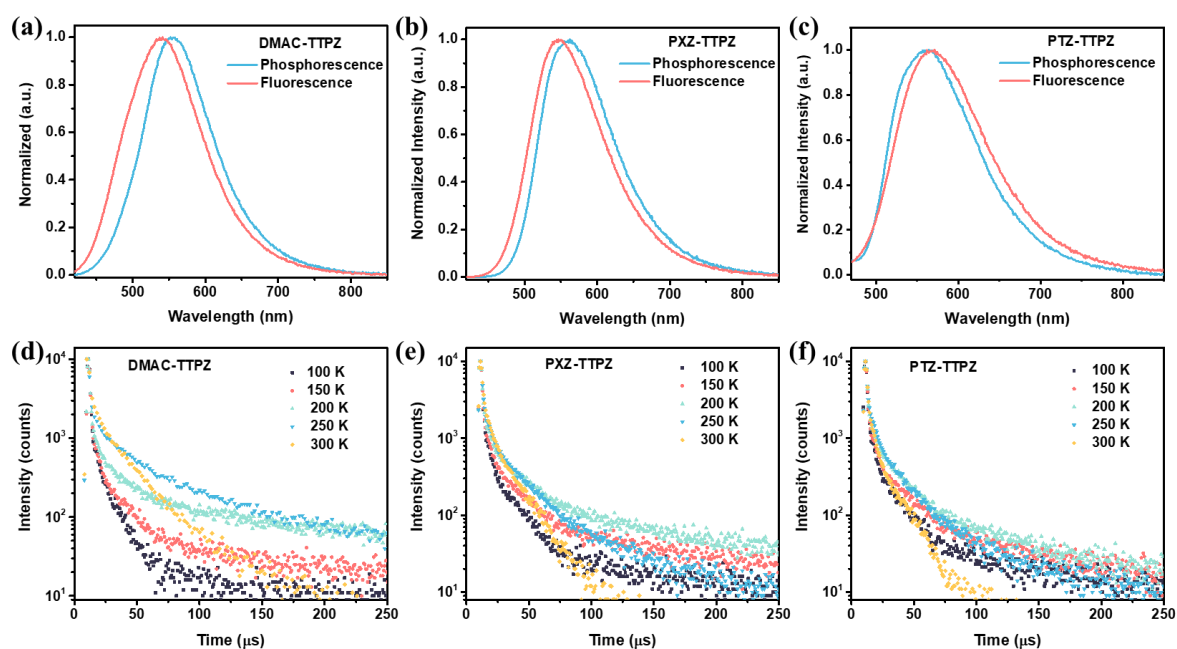

Figure S19. Fluorescence (298 K) and phosphorescence (77 K) spectra of DMAC-TTPZ (a), PXZ-TTPZ (b), and PTZ-TTPZ (c) in the doped PMMA film (5 wt%). Time-resolved PL decay curves of DMAC-TTPZ (d), PXZ-TTPZ (e), and PTZ-TTPZ (f) in the doped PMMA film (5 wt%) at different temperatures.

## 5. Device Performances

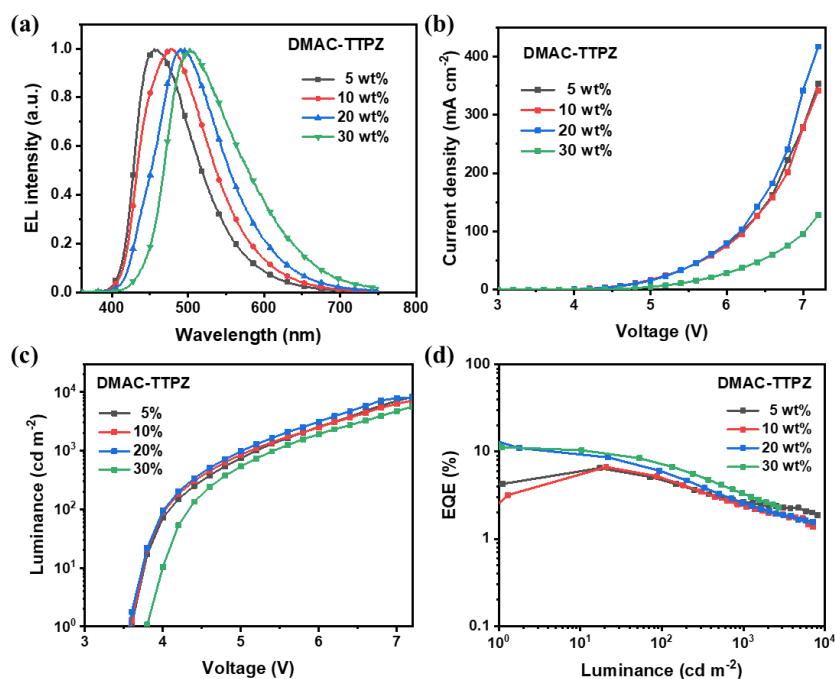

Figure S20. EL spectra (a), current density (b) and luminance (c) as a function of voltage, and EQE versus luminance of DMAC-TTPZ with different doping ratios in OLEDs.

Table S2. Summary of OLED characteristics based on DMAC-TTPZ.

| Concentration (wt%) | V <sub>on</sub> (V) | EQE <sub>max</sub> (%) | PE <sub>max</sub> (lm W <sup>-1</sup> ) | CIE          | λ <sub>max</sub> (nm) | FWHM (nm) |
|---------------------|---------------------|------------------------|-----------------------------------------|--------------|-----------------------|-----------|
| 5                   | 3.6                 | 6.5                    | 11.9                                    | (0.18, 0.21) | 456                   | 90        |
| 10                  | 3.6                 | 6.7                    | 13.5                                    | (0.19, 0.28) | 478                   | 104       |
| 20                  | 3.6                 | 11.0                   | 23.5                                    | (0.23, 0.37) | 490                   | 102       |
| 30                  | 3.8                 | 11.2                   | 22.1                                    | (0.29, 0.46) | 502                   | 111       |

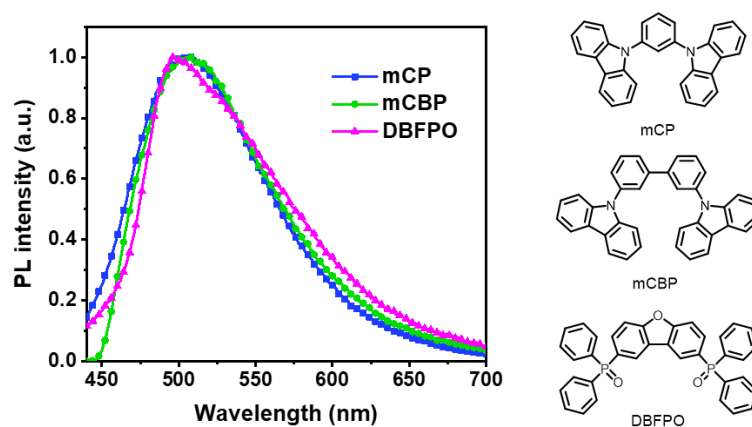

Figure S21. PL spectra of DMAC-TTPZ doped in mCP, mCBP, and DBFPO (5 wt%).

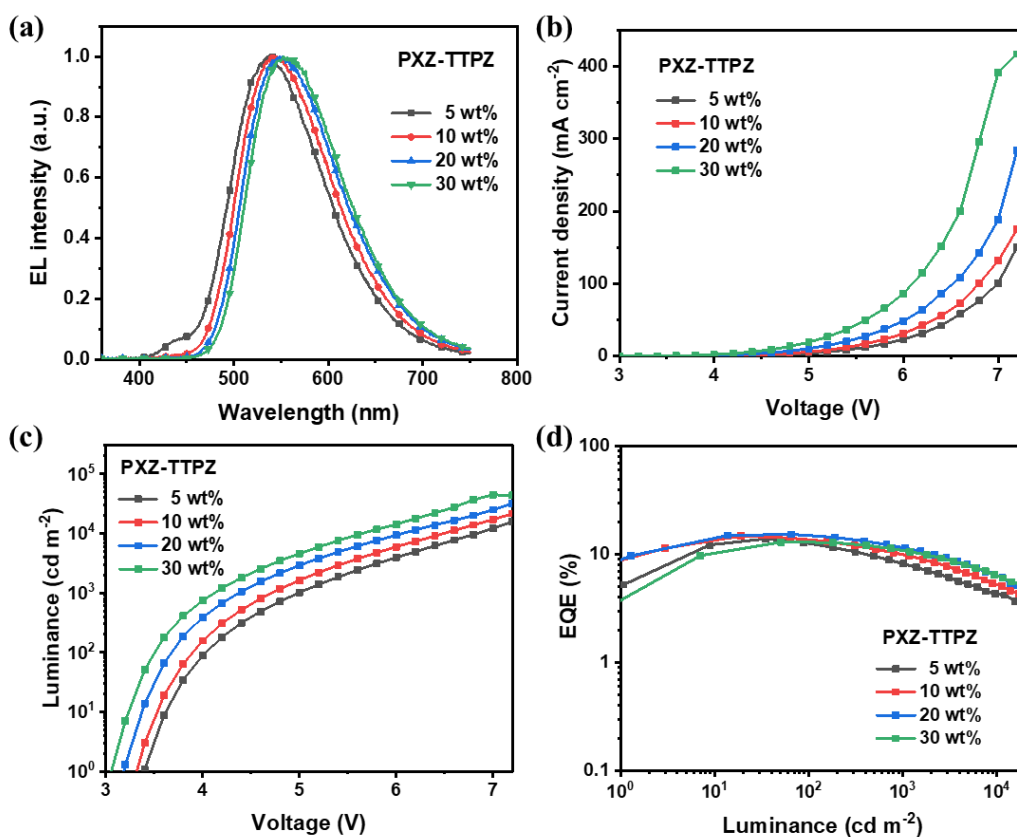

Figure S22. EL spectra (a), current density (b) and luminance (c) as a function of voltage, and EQE versus luminance of PXZ-TTPZ with different doping ratios in OLEDs.

**Table S3.** Summary of OLED characteristics based on PXZ-TTPZ.

| Concentration (wt%) | $V_{\text{on}}$ (V) | $\text{EQE}_{\text{max}}$ (%) | $\text{PE}_{\text{max}}$ ( $\text{lm W}^{-1}$ ) | CIE          | $\lambda_{\text{max}}$ (nm) | FWHM (nm) |
|---------------------|---------------------|-------------------------------|-------------------------------------------------|--------------|-----------------------------|-----------|
| 5                   | 3.4                 | 13.9                          | 35.5                                            | (0.36, 0.53) | 536                         | 113       |
| 10                  | 3.4                 | 14.8                          | 39.1                                            | (0.39, 0.55) | 546                         | 114       |
| 20                  | 3.2                 | 15.3                          | 41.0                                            | (0.42, 0.54) | 551                         | 116       |
| 30                  | 3.2                 | 13.0                          | 35.2                                            | (0.43, 0.54) | 553                         | 116       |

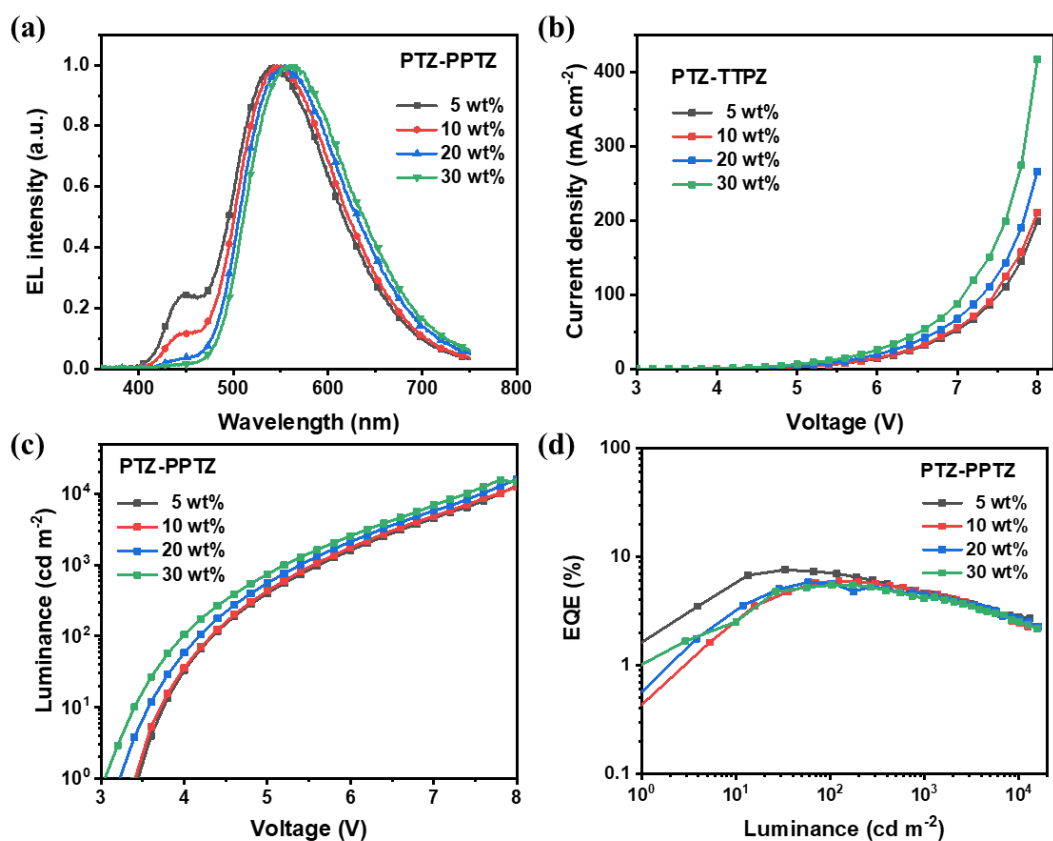

Figure S23. EL spectra (a), current density (b) and luminance (c) as a function of voltage, and EQE versus luminance of PTZ-TTPZ with different doping ratios in OLEDs.

**Table S4.** Summary of OLED characteristics based on PTZ-TTPZ.

| Concentration (wt%) | $V_{\text{on}}$ (V) | $\text{EQE}_{\text{max}}$ (%) | $\text{PE}_{\text{max}}$ ( $\text{lm W}^{-1}$ ) | CIE          | $\lambda_{\text{max}}$ (nm) | FWHM (nm) |
|---------------------|---------------------|-------------------------------|-------------------------------------------------|--------------|-----------------------------|-----------|
| 5                   | 3.6                 | 7.6                           | 17.3                                            | (0.36, 0.48) | 542                         | 121       |
| 10                  | 3.6                 | 6.0                           | 12.4                                            | (0.39, 0.51) | 546                         | 121       |
| 20                  | 3.4                 | 5.8                           | 12.8                                            | (0.42, 0.53) | 554                         | 125       |
| 30                  | 3.2                 | 5.5                           | 11.8                                            | (0.44, 0.53) | 567                         | 126       |
